# Supplementary material
Source: Elsevier journal article supplement (https://www.sciencedirect.com/science/article/pii/S2530064420300250)
Supplement: mmc2 [file S2530064420300250:mmc2.docx]

**Table S2**: Model performance (mean ± sd AUC values) for each dataset. The selected algorithms (AUC > 0.75) highlighted in bold.

|  |  | **"conservative" dataset** | |  | **"non-conservative" dataset** | |
| --- | --- | --- | --- | --- | --- | --- |
| **Algorithm** |  | AUC | SD |  | AUC | SD |
| SRE |  | 0.646 | 0.022 |  | 0.652 | 0.024 |
| GLM |  | 0.584 | 0.082 |  | 0.645 | 0.209 |
| **MAXENT** |  | **0.766** | **0.029** |  | **0.75** | **0.031** |
| RF |  | 0.527 | 0.021 |  | 0.529 | 0.009 |
| CTA |  | 0.704 | 0.026 |  | 0.705 | 0.031 |
