# Supplementary material
Source: Elsevier journal article supplement (https://www.sciencedirect.com/science/article/pii/S2530064420300250)
Supplement: mmc3 [file S2530064420300250:mmc3.docx]

**Table S3:** Schroener’s D alternative hypothesis test. H1 = "greater" hypothesizes that the similarity between the two niches tested is greater than expected at random. H1 = "lower" hypothesizes that the similarity between the two niches tested is lower than expected at random. NAC is “native and invasive populations”; NAE is “native and invasive but established populations”.

|  |  | **NAE** | |  | **NAC** | |
| --- | --- | --- | --- | --- | --- | --- |
| **Alternative Hypothesis** |  | **Schroener's D** | ***P*** |  | **Schroener's D** | ***P*** |
| *"Greater"* |  | 0.31 | 0.198 |  | 0.372 | 0.039 |
| *"Lower"* |  | 0.31 | 0.821 |  | 0.372 | 0.98 |
